# Supplementary material for: Synergistic effect of Co–Ni co-bridging with MoS2 nanosheets for enhanced electrocatalytic hydrogen evolution reactions
Source: Royal Society of Chemistry journal article supplement (doi:10.1039/c7ra12692a), 2018-01-01
Supplement: c7ra12692a1.pdf [file c7ra12692a1.pdf]

## Supporting Information

### **Synergistic Effect of Co-Ni Co-Bridging with MoS<sub>2</sub> Nanosheets for Enhanced Electrocatalytic Hydrogen Evolution Reactions**

Ammar Bin Yousaf,<sup>a,‡</sup> Muhammad Imran,<sup>b,‡,\*</sup> Muhammad Farooq,<sup>c</sup> and Peter  
Kasak,<sup>a,\*</sup>

<sup>a</sup> Center for Advanced Materials, Qatar University, Doha 2713, Qatar

<sup>b</sup> Hefei National Laboratory for Physical Sciences at Microscale, University of  
Science and Technology of China, Hefei, Anhui 230026, PR China

<sup>c</sup> Department of Chemistry, University of Management and Technology, Lahore,  
54000, Pakistan

<sup>‡</sup>These two authors contributed equally to this work.

Correspondence and requests for materials should be addressed to M. Imran & P.

Kasak

\*Email: [imran345@mail.ustc.edu.cn](mailto:imran345@mail.ustc.edu.cn) (M.I), [peter.kasak@qu.edu.qa](mailto:peter.kasak@qu.edu.qa) (P.K)

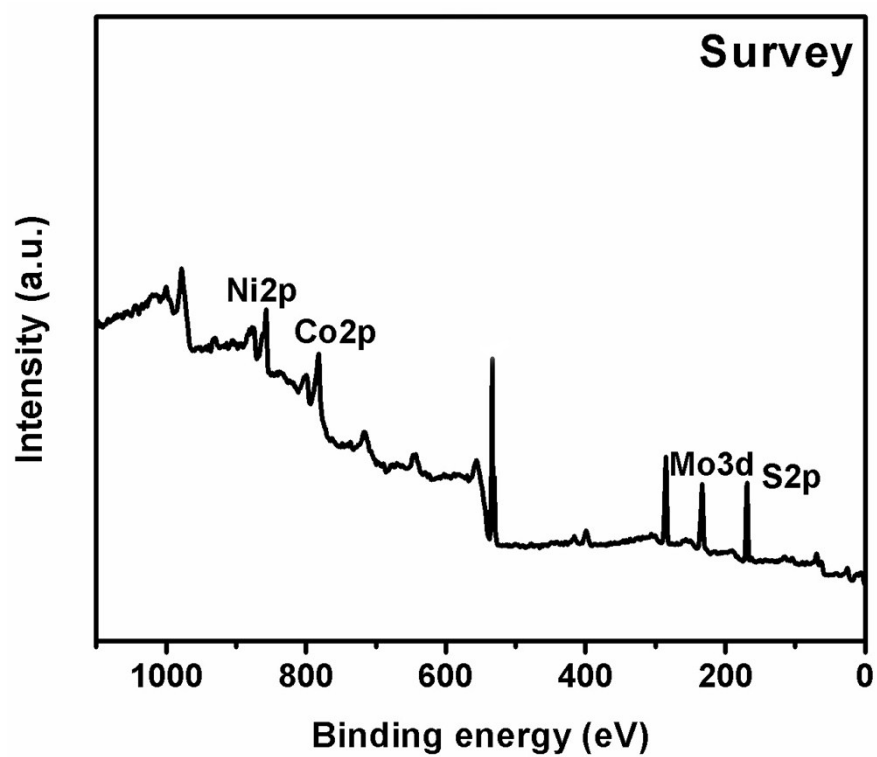

Figure S1. Survey XPS spectrum of Co-Ni/MoS<sub>2</sub> nanocomposite.

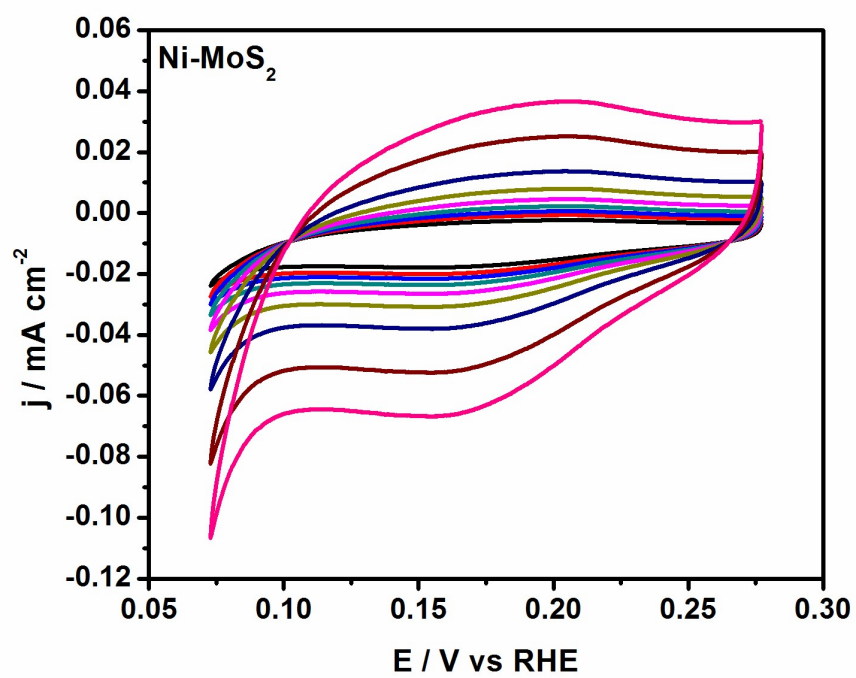

**Figure S2:** The cyclic voltammetry at various scan rates for Ni-MoS<sub>2</sub> catalyst.

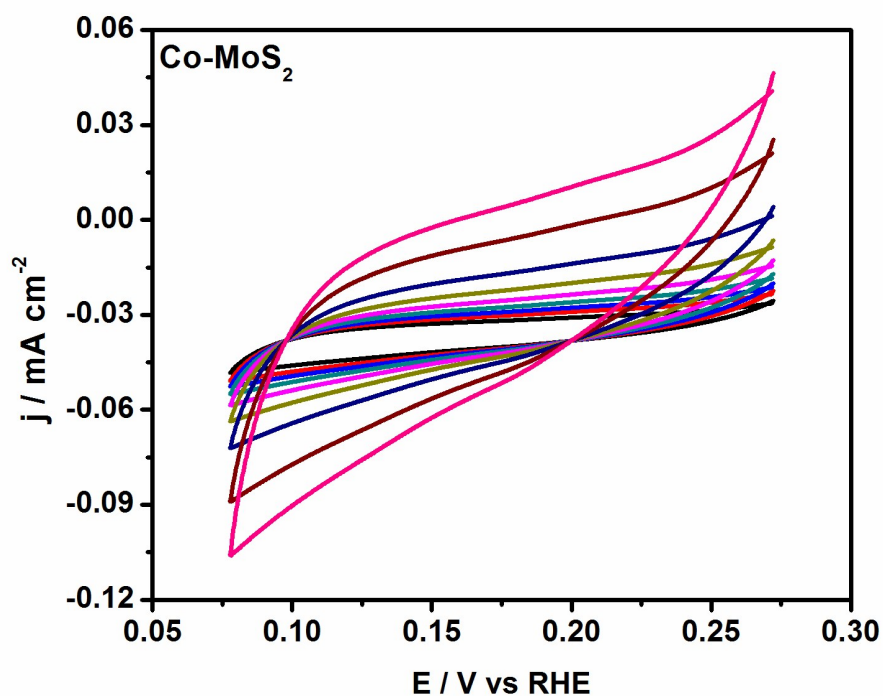

**Figure S3:** The cyclic voltammetry at various scan rates for Co-MoS<sub>2</sub> catalyst.

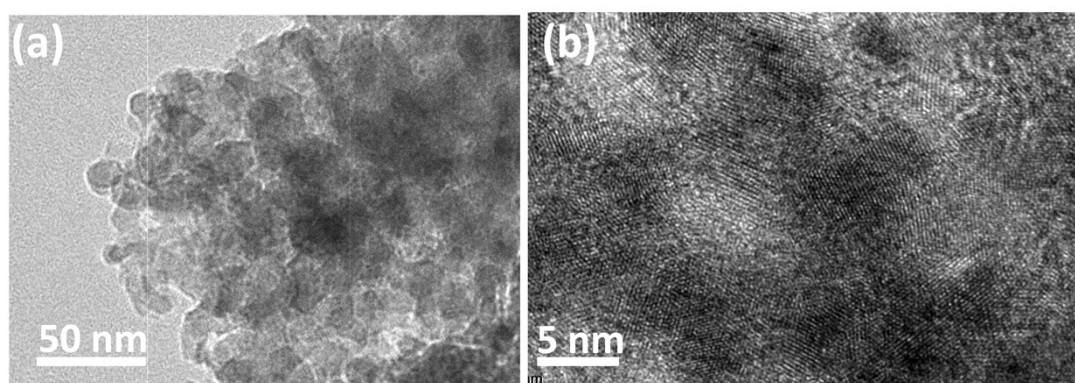

**Figure S4.** TEM images after accelerated durability test (ADT) for 2000 cycles.

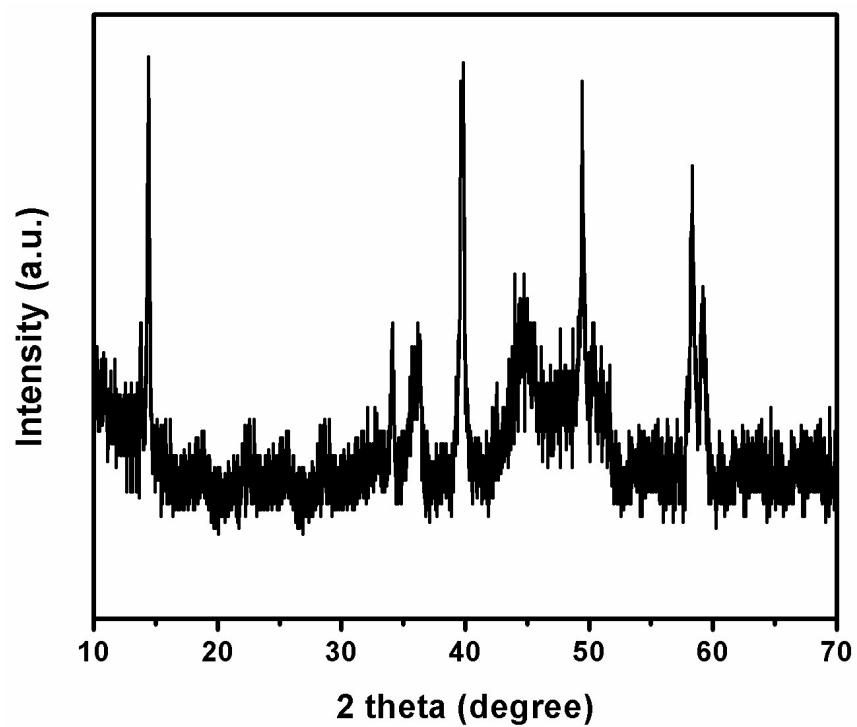

**Figure S5.** XRD pattern of Co-Ni/MoS<sub>2</sub> nanocomposite after accelerated durability test (ADT) for 2000 cycles.

Table S1: Calculated parameters of HER performance for all the catalysts.

| Sr.<br>no. | catalyst               | overpotential<br>(mV) | current density<br>(j = mA cm <sup>-2</sup> ) | Tafel slope<br>(mV/decay) |
|------------|------------------------|-----------------------|-----------------------------------------------|---------------------------|
| 01         | MoS <sub>2</sub>       | 210                   | 21                                            | 106                       |
| 02         | Ni- MoS <sub>2</sub>   | 80                    | 66                                            | 62                        |
| 03         | Co-MoS <sub>2</sub>    | 75                    | 73                                            | 58                        |
| 04         | Ni-Co-MoS <sub>2</sub> | 45                    | 92                                            | 49                        |
